# Supplementary material for: Speeding up iterative applications of the BUILD supertree algorithm
Source: PeerJ journal article supplement (doi:10.7717/peerj.16624), 2024-01-02
Supplement: otcetera-2287cef.tar.gz [file otcetera-2287cef.tar.gz]

A phylogenetic tree diagram illustrating the evolutionary relationships between eight taxa: a, b, c, d, e, x, y, and m. The tree is rooted at the bottom with a single vertical line. A horizontal line branches from the root, with a vertical line leading to taxon 'm' on the left. The main branch continues to the right and splits into two major clades. The left clade consists of a horizontal line that branches into a vertical line leading to taxon 'a' and another vertical line leading to a node. From this node, a vertical line leads to a horizontal line that branches into a vertical line leading to taxon 'b' and another vertical line leading to taxon 'c'. The right clade consists of a vertical line leading to a horizontal line that branches into a vertical line leading to taxon 'd' and another vertical line leading to taxon 'e'. Further to the right, a vertical line leads to a horizontal line that branches into a vertical line leading to taxon 'x' and another vertical line leading to taxon 'y'.
