# Supplementary figures and images for: Speeding up iterative applications of the BUILD supertree algorithm
Source: PeerJ journal article supplement (doi:10.7717/peerj.16624), 2024-01-02

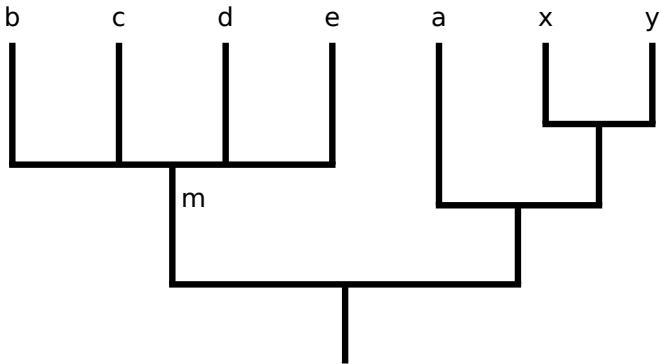

Supplement: otcetera-2287cef.tar.gz [file otcetera-2287cef.tar.gz]

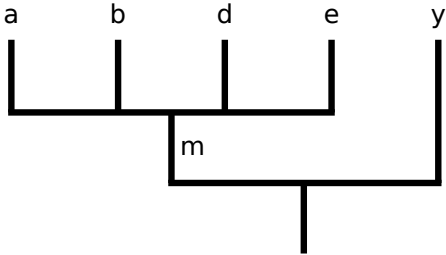

Supplement: otcetera-2287cef.tar.gz [file otcetera-2287cef.tar.gz]

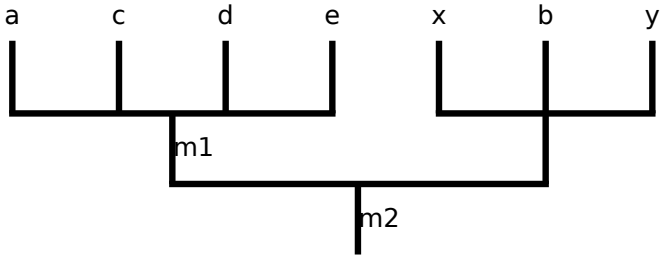

Supplement: otcetera-2287cef.tar.gz [file otcetera-2287cef.tar.gz]

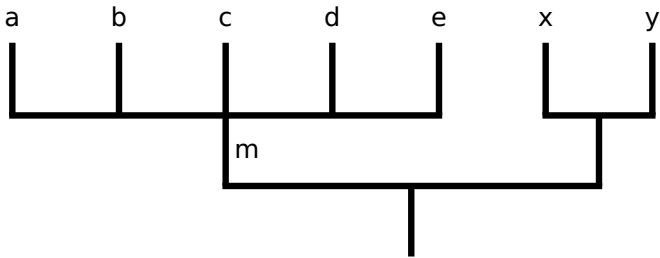

Supplement: otcetera-2287cef.tar.gz [file otcetera-2287cef.tar.gz]

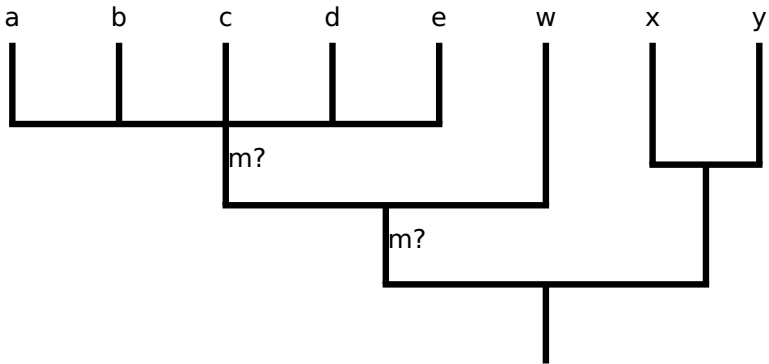

Supplement: otcetera-2287cef.tar.gz [file otcetera-2287cef.tar.gz]

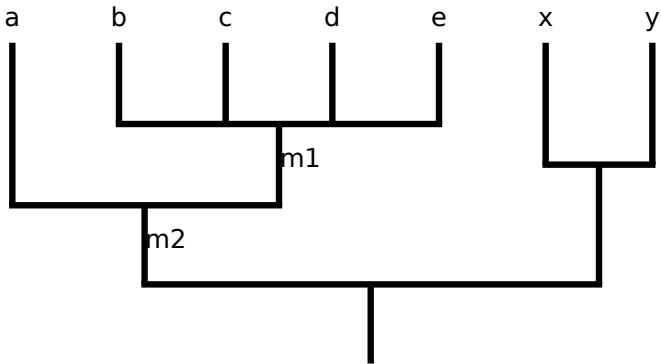

Supplement: otcetera-2287cef.tar.gz [file otcetera-2287cef.tar.gz]

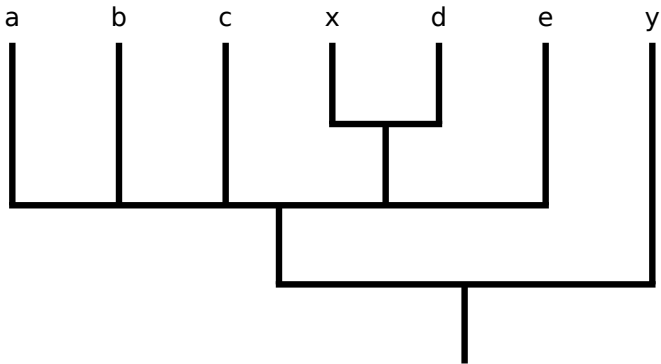

Supplement: otcetera-2287cef.tar.gz [file otcetera-2287cef.tar.gz]
